# Supplementary material for: Prognostic Impact of Acute Myocardial Infarction in Patients Presenting With Ventricular Tachyarrhythmias and Aborted Cardiac Arrest
Source: PubMed Central journal article supplement — J Am Heart Assoc. 2018 Sep 25;7(19):e010004. doi: 10.1161/JAHA.118.010004 (PMC6404887; doi:10.1161/jaha.118.010004), 2018-09-25
Supplement: JAH3-7-e010004-s001.pdf [file JAH3-7-e010004-s001.pdf]

# **SUPPLEMENTAL MATERIAL**

**Table S1. Distribution of infarct-related VTs, unmatched cohort.**

| <b>Characteristic</b>   | <b>STEMI</b><br>(n = 276; 10%) | <b>NSTEMI</b><br>(n = 549; 19%) |
|-------------------------|--------------------------------|---------------------------------|
| Ventricular tachycardia | 81 (29)                        | 167 (31)                        |
| VT <48h, overall        | 60 (22)                        | 110 (20)                        |
| VT <48h, without SCD    | 51 (18)                        | 76 (14)                         |
| VT >48h, overall        | 12 (4)                         | 28 (5)                          |
| VT >48h, without SCD    | 12 (4)                         | 25 (5)                          |

NSTEMI, non ST segment elevation myocardial infarction; SCD, sudden cardiac death; ST, segment elevation myocardial infarction; VT, ventricular tachycardia.
